# Supplementary material
Source: PubMed Central journal article supplement (PMC5206917)

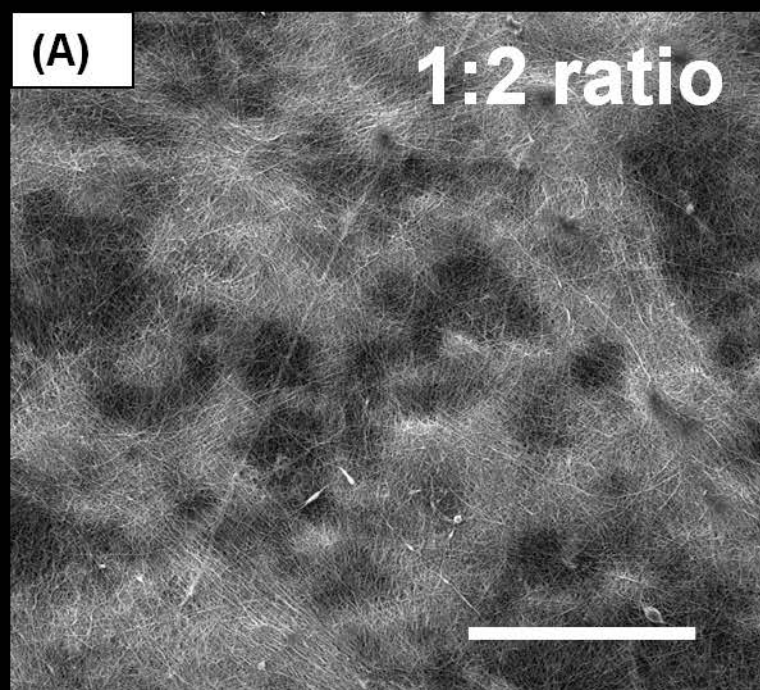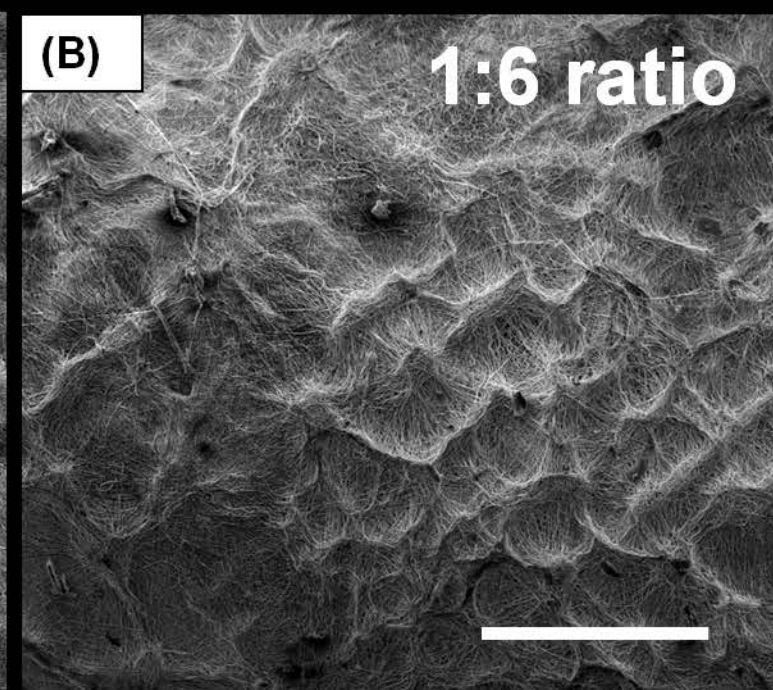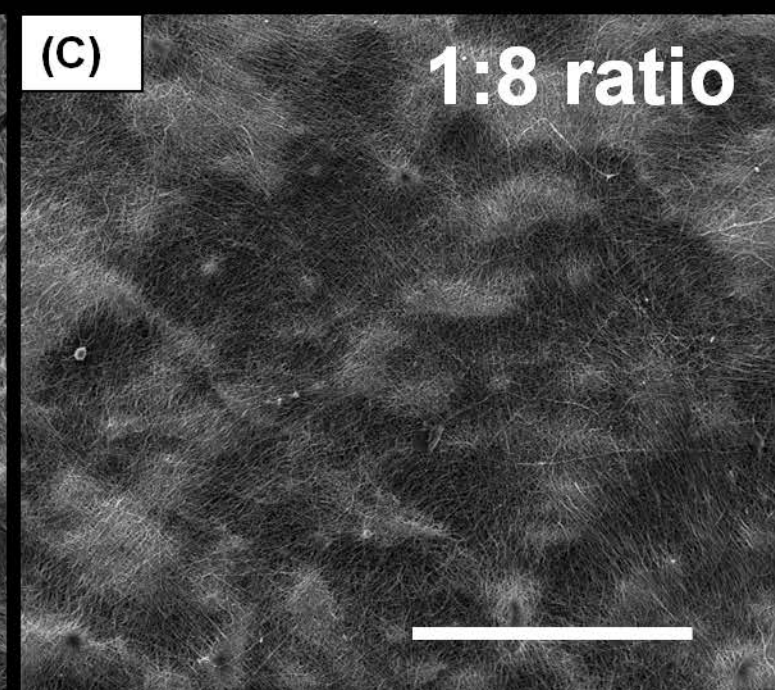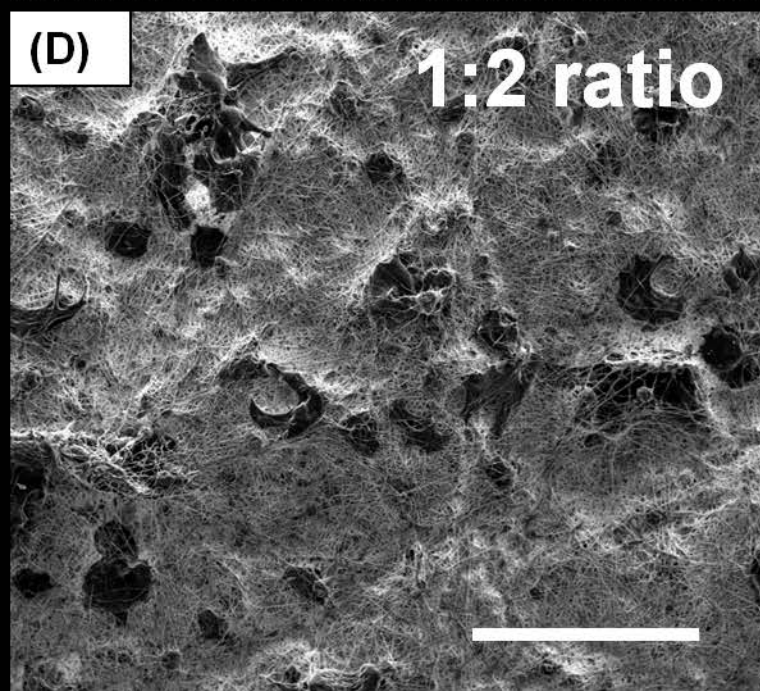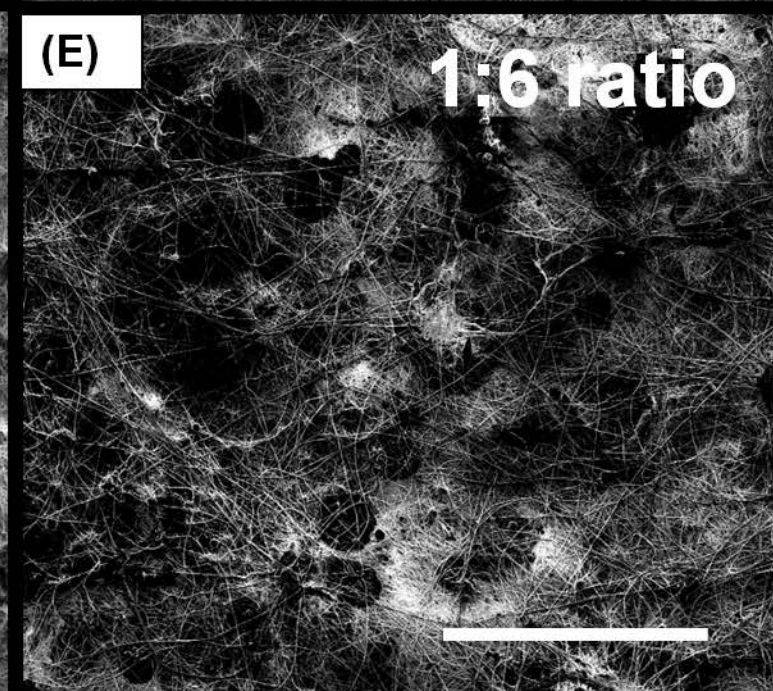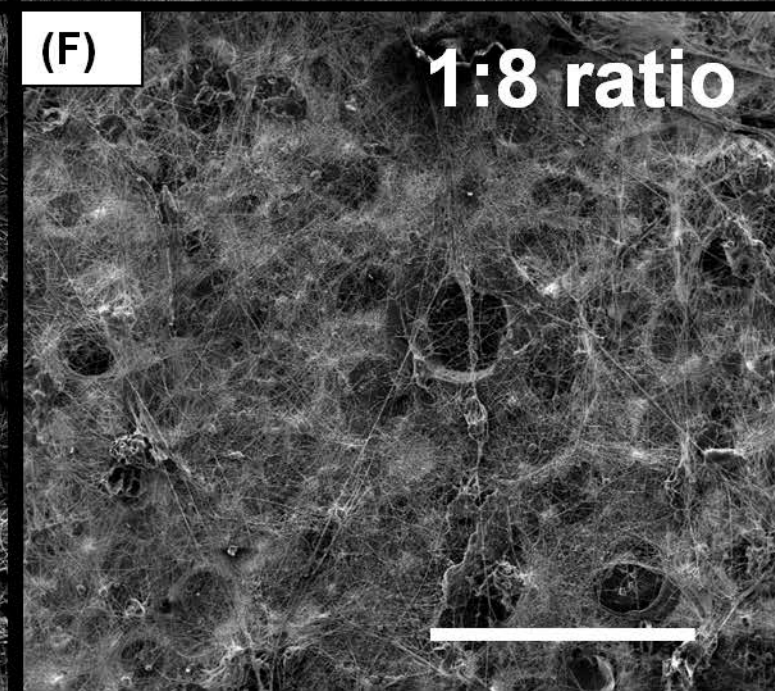

Supplement: NIHMS836306-supplement-Supplement_Fig.pdf [file NIHMS836306-supplement-Supplement_Fig.pdf]
